# Supplementary material for: Chromosome-Scale Genome Assembly and Transcriptome Assembly of Kawakawa Euthynnus affinis; A Tuna-Like Species
Source: Frontiers journal article supplement (doi:10.3389/fgene.2021.739781), 2021-09-20
Supplement: Table_2.xlsx [file Table_2.xlsx]

## Sheet: Supplementary_Table_2
	Phenotype					Sequencing_reads					Mapping
Sample ID	Body weight (g)	Standard lenght (mm)	Head lenght (mm)	Body depth (mm)		Number of raw reads (paired)	Lenght of raw reads(Mb)	Number of trimmed reads (paired)	Lenght of trimmed reads(Mb)		Total mapped reads in pair (count)	Total mapped reads (%)	Uniquly mapped reads (count)	Uniquly mapped reads (%)	Remakrs
1B	2434	490	121	142		836438	127.139	699947	104.335		640102	0.9145	516609	0.7445
1S	1581	446	112	123		435550	66.2036	352115	52.4193		326974	0.9286	265312	0.7621
2B	2490	481	103	154		495098	75.2549	395854	59.0986		366363	0.9255	300030	0.7633
2B_b	2413	481	113	149		818674	124.438	673735	100.325		623138	0.9249	505779	0.7586
2B_c	2340	488	119	140		899330	136.698	733469	109.363		679192	0.926	551314	0.7583
3B	2609	482	103	161		336322	51.1209	273477	40.7682		251544	0.9198	203639	0.7521
4S	1580	436	110	121		675648	102.698	548335	81.954		508197	0.9268	409932	0.7513
5B	2357	480	112	149		390412	59.3426	312398	46.4827		288968	0.925	235792	0.7638
5S	1476	443	110	116		781650	118.811	627363	93.5318		574915	0.9164	461156	0.7422
6B	2405	489	99	158		541954	82.377	441538	65.8262		406171	0.9199	327542	0.7484
7B	2376	508	115	149		1483832	225.542	1213536	180.817		1.1224e+06	0.9249	900887	0.7497
8S	1490	429	109	119		569426	86.5528	455141	67.871		420914	0.9248	338488	0.7506
10B	2444	476	99	153		591648	89.9305	489418	73.0582		442728	0.9046	350768	0.7216
12B	2315	493	123	143		1247860	189.675	1001360	149.574		929262	0.928	753746	0.7571
13B	2385	484	103	148		386376	58.7292	316145	47.2182		293446	0.9282	241193	0.7671
14B	2316	465	107	150		1153688	175.361	937486	139.857		869987	0.928	706802	0.7601
15B	2871	429	97	136		972286	147.787	791606	118.067		721311	0.9112	574839	0.7329
15B_b	2369	474	105	151		1324070	201.259	1063397	158.822		970775	0.9129	775349	0.7336
15B_c	2337	475	107	149		908586	138.105	741392	110.512		678744	0.9155	540219	0.7357
15B_d	2441	467	109	151		864150	131.351	688564	102.709		633066	0.9194	506446	0.7418
16S	1588	447	111	123		829342	126.06	672943	100.371		617089	0.917	497800	0.746
16S_b	1577	439	109	119		1003872	152.589	819984	122.22		755943	0.9219	604792	0.7444
18S	1602	455	110	123		844100	128.303	675165	100.676		626756	0.9283	504977	0.7547
19B	2316	486	122	142		618402	93.9971	505205	75.4463		470497	0.9313	387698	0.7717
19S	1465	424	105	124		1106258	168.151	879051	131.084		813913	0.9259	658406	0.7563
21B	2439	469	106	159		622704	94.651	506919	75.7548		469914	0.927	380257	0.7543
21B_b	2376	464	95	150		579688	88.1126	475901	71.0652		442588	0.93	362120	0.7655
21B_c	2407	497	127	143		597836	90.8711	489910	72.9641		449884	0.9183	365326	0.7539
22S	1583	423	109	120		663198	100.806	531960	79.3142		490361	0.9218	395036	0.7494
23B	2401	472	99	155		537196	81.6538	437177	64.9683		400542	0.9162	319874	0.7419
25B	2302	449	105	146		1230142	186.982	997719	148.076		901240	0.9033	700747	0.7143
25S	1487	429	111	121		1300316	197.648	1041450	155.645		972818	0.9341	784563	0.757
26B	2466	479	103	156		1188748	180.69	973554	145.428		906281	0.9309	737486	0.7615
26S	1530	430	108	116		825910	125.538	668641	99.701		611338	0.9143	487338	0.7358
28B	2614	475	105	155		500706	76.1073	405883	60.5984		373128	0.9193	303269	0.7522
28B_b	2461	488	111	152		564874	85.8608	458696	68.3182		424798	0.9261	345677	0.7613
29S	1519	434	103	121		264856	40.2581	216078	32.267		201341	0.9318	165657	0.7711
31B	2971	435	99	138		1337696	203.33	1081077	161.301		992753	0.9183	793495	0.7401
32B	2559	481	106	151		973020	147.899	802378	119.47		740515	0.9229	597782	0.7531
32B_b	2330	464	102	154		1232358	187.318	1004485	150.073		930153	0.926	751405	0.7521
32S	1570	425	102	126		665910	101.218	531998	79.4908		493109	0.9269	400081	0.7561
33B	2310	493	110	150		1699220	258.281	1388625	207.355		1.27198e+06	0.916	1016716	0.7367
35B	2405	477	114	147		789190	119.957	637592	95.0342		586776	0.9203	475952	0.7536
35S	1616	438	106	128		1459740	221.88	1182101	176.581		1.08895e+06	0.9212	878339	0.7469
35S_b	1504	426	108	121		991984	150.782	795432	118.491		740149	0.9305	594392	0.7557
36S	1617	436	11	126		1294638	196.785	1055237	157.626		970818	0.92	777777	0.741
36S_b	1627	443	105	125		1108128	168.435	893457	133.498		820015	0.9178	653901	0.7358
36S_c	1590	429	107	118		1018654	154.835	810253	120.79		747296	0.9223	601339	0.7493
37B	2352	453	96	150		259392	39.4276	211013	31.4646		194681	0.9226	159380	0.7623
37B_b	2313	473	103	144		661492	100.547	539106	80.3956		500398	0.9282	408364	0.7639
38B	2317	456	98	149		407180	61.8914	330467	49.3419		302146	0.9143	243895	0.7431
38S	1470	410	102	117		1070828	162.766	868022	129.69		808215	0.9311	652435	0.7556
39S	1615	426	100	121		995980	151.389	800718	119.465		737221	0.9207	589367	0.7424
41S	1595	427	108	119		691852	105.162	556808	83.0481		507530	0.9115	401162	0.7271
41S_b	1609	436	113	117		522136	79.3647	419893	62.6328		392516	0.9348	315651	0.7583
42S	1392	437	108	116		759520	115.447	615057	91.8589		567698	0.923	458297	0.7495
43B	2312	463	100	149		629122	95.6265	511214	75.9828		472259	0.9238	381690	0.757
43B_b	2311	453	101	148		967140	147.005	793718	118.333		737205	0.9288	598635	0.761
43S	1596	445	112	125		884262	134.408	718709	107.19		659847	0.9181	526717	0.7398
43B_c	2368	507	119	145		670716	101.949	549863	81.792		506754	0.9216	412287	0.7589
44S	1607	447	111	122		734904	111.705	591442	88.3396		547498	0.9257	447021	0.7602
44S_b	1419	432	106	116		1073062	163.105	853042	127.436		783946	0.919	631080	0.7439
47B	2364	455	100	145		504840	76.7357	408135	60.8944		379484	0.9298	310772	0.7675
47S	1550	442	110	116		1118188	169.965	894726	133.474		826458	0.9237	654330	0.7378
48S	1585	440	109	117		721182	109.62	579137	86.5105		540914	0.934	443485	0.7702
49S	1390	433	107	116		738834	112.303	587943	87.8093		534675	0.9094	425325	0.728
50S	1523	424	104	119		868802	132.058	702064	104.6		645407	0.9193	516276	0.7435
51B	2364	454	108	148		973812	148.019	785660	117.23		730507	0.9298	590474	0.7578
51S	1581	446	100	122		724726	110.158	585975	87.3269		532475	0.9087	420348	0.7248
52B	2359	499	118	149		633568	96.3023	513454	76.6865		476896	0.9288	389512	0.7631
52S	1610	455	117	124		776488	118.026	626525	93.6217		580287	0.9262	471467	0.7564
52S_b	1615	441	106	123		1182442	179.731	951132	141.606		876658	0.9217	697128	0.7415
55B	2368	465	104	154		529414	80.4709	427437	63.7203		396662	0.928	324443	0.7662
55B_b	2402	472	110	150		508242	77.2528	417342	62.2005		387252	0.9279	312023	0.7551
55S	1594	427	107	119		1173920	178.436	944449	141.147		873521	0.9249	703244	0.7485
58S	1624	451	105	125		502050	76.3116	403247	60.2311		373649	0.9266	305569	0.7622
59B	2340	478	115	137		1100946	167.344	911366	135.996		837090	0.9185	670079	0.7413
60B	2303	492	111	151		944748	143.602	757915	113.133		689551	0.9098	549349	0.73
60S	1546	431	112	118		1217512	185.062	976984	145.494		897067	0.9182	708055	0.7328
61B	2331	460	102	152		423668	64.3975	347164	51.8665		320328	0.9227	258248	0.7481
62S	1526	413	98	122		617888	93.919	494612	73.58		436594	0.8827	337089	0.6915
63S	1586	443	104	123		1409218	214.201	1129432	168.782		1.03445e+06	0.9159	819663	0.7296
65S	1485	422	102	117		828538	125.938	680968	101.598		622473	0.9141	493516	0.7306
65S_b	1612	443	108	118		873638	132.793	693821	103.382		645739	0.9307	525251	0.7649
66S	1437	432	98	12		1077548	163.787	874129	130.682		802188	0.9177	638248	0.7337
66S_b	1412	429	107	118		577246	87.7414	464352	69.2435		429386	0.9247	345423	0.7505
67S	1442	420	106	113		743546	113.019	599742	89.4712		552902	0.9219	445095	0.7482
70B	2390	488	116	144		901966	137.099	744677	111.208		696869	0.9358	573377	0.7743
70S	1631	434	105	124		631628	96.0075	502372	74.7312		463689	0.923	373156	0.7531
71B	2456	472	106	154		762050	115.832	615959	91.8684		570809	0.9267	460197	0.7541
72S	1554	410	102	121		880028	133.764	697889	104.128		649804	0.9311	530951	0.767
73S	1604	449	109	125		713606	108.468	572692	85.3989		533291	0.9312	433412	0.764
77B	2394	485	114	143		680828	103.486	559031	83.5083		523309	0.9361	429105	0.7716
78S	1628	442	107	129		1161520	176.551	937135	140.082		862258	0.9201	686162	0.7357
F15	2580	524	N/A	152		822646	125.042	664153	99.0393		597007	0.8989	466128	0.7087	female parent
M4	2620	532	N/A	155		882850	134.193	708951	105.841		643869	0.9082	505532	0.7186	male parent
